# Supplementary material
Source: publisher site journal article supplement (https://www.dovepress.com/article/433136)
Supplement: Supplementary file 1 [file get_supplementary_file.php]

**Supplementary Table S1** Result of multivariable logistic regression

|  | Beta | OR | P |
| --- | --- | --- | --- |
| Age | -0.002 | 0.998 | 0.437 |
| Sex | -0.021 | 0.979 | 0.791 |
| ASA grade | 0.115 | 1.122 | 0.234 |
| Hypertension | 0.025 | 1.025 | 0.831 |
| Diabetes | -0.321 | 0.725 | 0.014 |
| CAD | 0.403 | 1.497 | 0.041 |
| Type of surgery | 0.611 | 1.843 | <0.001 |
| Type of anesthesia | 0.170 | 1.185 | 0.181 |
| Duration of surgery | 0.001 | 1.001 | 0.278 |
| Total fluid volume | 0.000 | 1.000 | 0.040 |
| Blood transfusion | -0.248 | 0.780 | 0.039 |
| Urine output | 0.000 | 1.000 | 0.464 |
| Blood loss | 0.000 | 1.000 | 0.546 |

**Abbreviations:** CAD, coronary arterial disease

**Supplementary Table S2** Subgroup analysis for moderate to severe pain within 72h after surgery.

| **Subgroup** | | Butorphanol | Sufentanil | *P* |
| --- | --- | --- | --- | --- |
| **Type of surgery** | | | | |
| POD1 at rest | Laparoscopic | 7/310 (2.3%) | 20/312 (6.4%) | 0.011 |
| Open | 22/598 (3.7%) | 79/596 (13.3%) | <0.001 |
| POD1 at movement | Laparoscopic | 14/310 (4.5%) | 43/312 (13.8%) | <0.001 |
| Open | 50/598 (8.4%) | 129/596 (21.6%) | <0.001 |
| POD2 at rest | Laparoscopic | 1/310 (0.3%) | 14/312 (4.5%) | 0.001 |
| Open | 10/598 (1.7%) | 28/596 (4.7%) | 0.003 |
| POD2 at movement | Laparoscopic | 5/310 (1.6%) | 23/312 (7.4%) | 0.001 |
| Open | 19/598 (3.2%) | 56/596 (9.4%) | <0.001 |
| POD3 at rest | Laparoscopic | 12/310 (3.9%) | 10/312 (3.2%) | 0.653 |
| Open | 53/598 (8.9%) | 47/596 (7.9%) | 0.542 |
| POD3 at movement | Laparoscopic | 24/310 (7.7%) | 17/312 (5.4%) | 0.294 |
| Open | 84/598 (14.0%) | 74/596 (12.4%) | 0.406 |
| **Type of anesthesia** | | | | |
| POD1 at rest | GA+ Nerve block | 29/816 (3.6%) | 87/807 (10.8%) | <0.001 |
| GA | 0/92 (0.0%) | 12/101 (11.9%) | <0.001 |
| POD1 at movement | GA+ Nerve block | 59/816 (7.2%) | 154/807 (19.1%) | <0.001 |
| GA | 5/92 (5.4%) | 18/101 (17.8%) | 0.008 |
| POD2 at rest | GA+ Nerve block | 10/816 (1.2%) | 38/807 (4.7%) | <0.001 |
| GA | 1/92 (1.1%) | 4/101 (4.0%) | 0.423 |
| POD2 at movement | GA+ Nerve block | 21/816 (2.6%) | 71/807 (8.8%) | <0.001 |
| GA | 3/92 (3.3%) | 8/101 (7.9%) | 0.163 |
| POD3 at rest | GA+ Nerve block | 58/816 (7.1%) | 51/807 (6.3%) | 0.526 |
| GA | 7/92 (7.6%) | 6/101 (5.9%) | 0.644 |
| POD3 at movement | GA+ Nerve block | 94/816 (11.5%) | 82/807 (10.2%) | 0.379 |
| GA | 14/92 (15.2%) | 9/101 (8.9%) | 0.177 |

**Abbreviations:** POD, postoperative day; GA, general anesthesia.
